# Supplementary material for: Squaraine based solution processed inverted bulk heterojunction solar cells processed in air
Source: Royal Society of Chemistry journal article supplement (doi:10.1039/c5cp05080d), 2015-09-22
Supplement: c5cp05080d1.pdf [file c5cp05080d1.pdf]

## Squaraine based Solution Processed Inverted Bulk Heterojunction Solar Cells Processed in Air

P. C. ReshmiVarma<sup>a</sup> and Manoj A. G. Namboothiry<sup>a\*</sup>

*a. School of Physics, Indian Institute of Science Education and Research  
Thiruvananthapuram, CET Campus, Engineering College P O, Thiruvananthapuram,  
Kerala, India. PIN 695016*

*\*Email: manoj@iisertvm.ac.in*

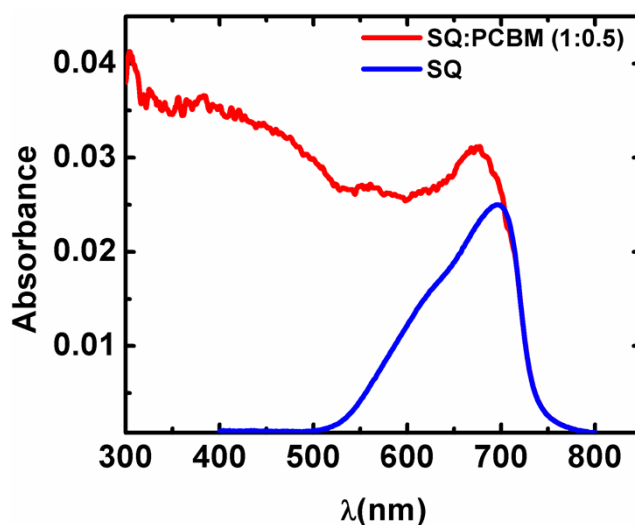

**Fig. S1** UV-Vis absorption of SQ:PCBM (of blend ratio 1:0.5) thin films of 100 nm thickness and that of pristine Squaraine of 100 nm thickness

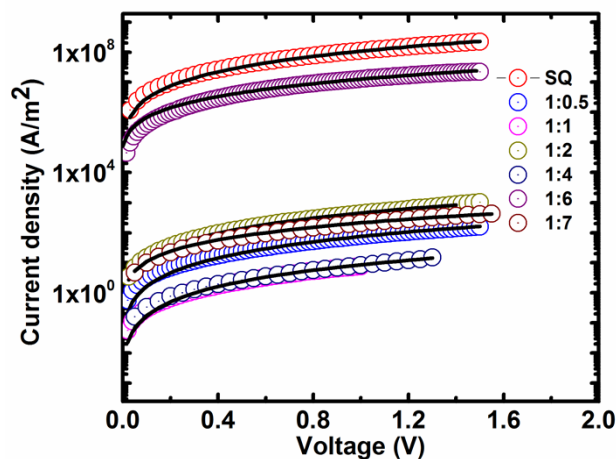

**Fig.S2** Dark J-V characteristics of hole only, ITO/PEDOT:PSS/SQN:PCBM/Au devices of different SQN:PCBM blend ratio. Straight line shows the calculated J-V characteristics using SCLC model

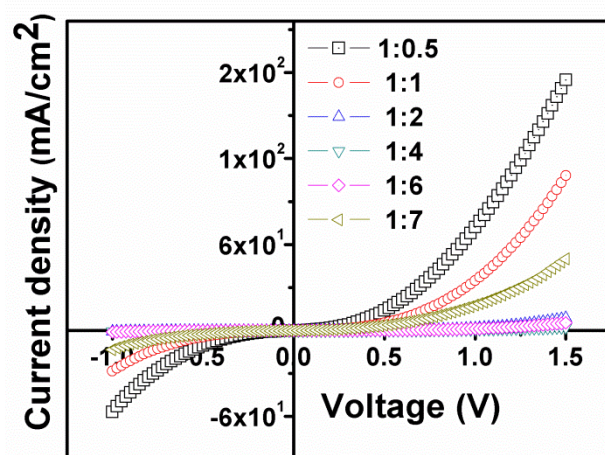

**Fig. S3.** Dark Current -Voltage characteristics of SQ: PCBM inverted bulk heterojunction solar cell in different donor : acceptor blend ratio

| SQ:PCBM blend ratio | Rectification ratio at 1 Volt |
|---------------------|-------------------------------|
| 1:0.5               | 1.28                          |
| 1:1                 | 1.221                         |
| 1:2                 | 2.617                         |
| 1:4                 | 1.23                          |
| 1:6                 | 1.15                          |
| 1:7                 | 1.325                         |

Table S1. Rectification ratio of the devices with different SQ: PCBM blend ratios
